# Supplementary material for: Differential Expression of Genes Associated with Chromatin Modifications in Skeletal Muscle during Aerobic Training Program
Source: MDPI journal article supplement (doi:10.3390/app12031159), 2022-01-23
Supplement: s1 [file s1]

Archive with 1 entries (1 files):
- Supplementary Table 1.pdf
