# Supplementary material for: Differential Expression of Genes Associated with Chromatin Modifications in Skeletal Muscle during Aerobic Training Program
Source: MDPI journal article supplement (doi:10.3390/app12031159), 2022-01-23
Supplement: s1 [file s1 › Supplementary Table 1.pdf]

Supplementary Table S1. Description of over-expressed genes associated with chromatin modifications in skeletal muscle included in the present study

| Gene ID | Symbol | Name                                                      | Locus    | Function                                                                                                                                                                                                                        |
|---------|--------|-----------------------------------------------------------|----------|---------------------------------------------------------------------------------------------------------------------------------------------------------------------------------------------------------------------------------|
| 2145    | EZH1   | Enhancer of zeste 1 polycomb repressive complex 2 subunit | 17q21.2  | It facilitates methylation of H3K27 and it is involved in embryonic stem-cell pluripotency and plasticity maintenance.                                                                                                          |
| 4297    | KMT2A  | Lysine methyltransferase 2A                               | 11q23.3  | It regulates gene expression throughout hematopoiesis and early development. Its H3K4 methyltransferase activity is involved in chromatin modifications and the consequent epigenetic transcriptional activation.               |
| 8085    | KMT2D  | Lysine methyltransferase 2D                               | 12q13.12 | It methylates H3K4. It contributes as a transcriptional regulator of estrogen receptor and beta-globin genes.                                                                                                                   |
| 23081   | KDM4C  | Lysine demethylase 4C                                     | 9p24.1   | It regulates gene expression and chromosome segregation by converting specific trimethylated histone residues to the dimethylated form.                                                                                         |
| 7403    | KDM6A  | Lysine demethylase 6A                                     | Xp11.3   | It catalyzes demethylation of tri/dimethylated H3.                                                                                                                                                                              |
| 1387    | CREBBP | CREB binding protein                                      | 16p13.3  | It has intrinsic histone acetyltransferase activity, and it participates in the transcriptional coactivation of transcription factors.                                                                                          |
| 83933   | HDAC10 | Histone deacetylase 10                                    | 22q13.33 | Its function of deacetylate histones modulates chromatin structure, contributing to cell cycle, and developmental event.                                                                                                        |
| 9759    | HDAC4  | Histone deacetylase 4                                     | 2q37.3   | It has histone deacetylase activity and inhibits transcription when bound to a promoter.                                                                                                                                        |
| 29947   | DNMT3L | DNA methyltransferase 3 like                              | 21q22.3  | It promotes de novo methylation by DNA cytosine methyltransferase 3 alpha, contributing to the establishment of maternal genomic imprints. It facilitates transcriptional inhibition by interacting with histone deacetylase 1. |

---

|      |      |                  |         |         |                                                                                                     |
|------|------|------------------|---------|---------|-----------------------------------------------------------------------------------------------------|
| 3014 | H2AX | H2A.X<br>histone | variant | 11q23.3 | It produces two transcripts using the conserved stem-loop termination and the polyA addition motifs |
|------|------|------------------|---------|---------|-----------------------------------------------------------------------------------------------------|

---
